# Supplementary material for: Nicotiana benthamiana Methanol-Inducible Gene (MIG) 21 Encodes a Nucleolus-Localized Protein That Stimulates Viral Intercellular Transport and Downregulates Nuclear Import
Source: MDPI journal article supplement (doi:10.3390/plants13020279), 2024-01-17
Supplement: s1 [file s1]

## Supplementary material

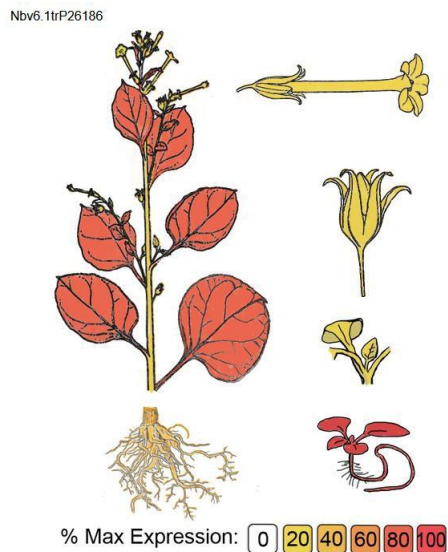

**Figure S1.** *NbMIG21* pattern of expression according to Version 6 Gene expression Atlas <https://sefapps02.qut.edu.au/atlas/tREX6.php>).

Pfam ID: UBN\_AB etllkrvkkrlrlkeeeeklkellekLkeaidevmpeqiekYekevaalaeakaakka.....d

MASLQCHKPAQHAPSTLCQKTTTVCNKANNEHHSFADKMKDMTDKMYHHDSHNHQSACHGKTQTQQAACHGKTQTQQAAC  
 HGTKTQQAASHRTKTQTACHGTSANGTKTQLSVACHGKTQTQQAASHGKTQTACHGTSATATHARACGKKKEGSFMH  
 KMRDQMRSSRRNRNKDGSCSDGSDSSSSSSSDESDNENCGRTKNRGSC

**Figure S2.** Motif search service (<https://www.genome.jp/tools/motif/>) revealed that *NbMIG21p* fragment from 15 to 81 positions (red) contains motif corresponding to ubinuclein conserved middle domain (PF14075) (framed).

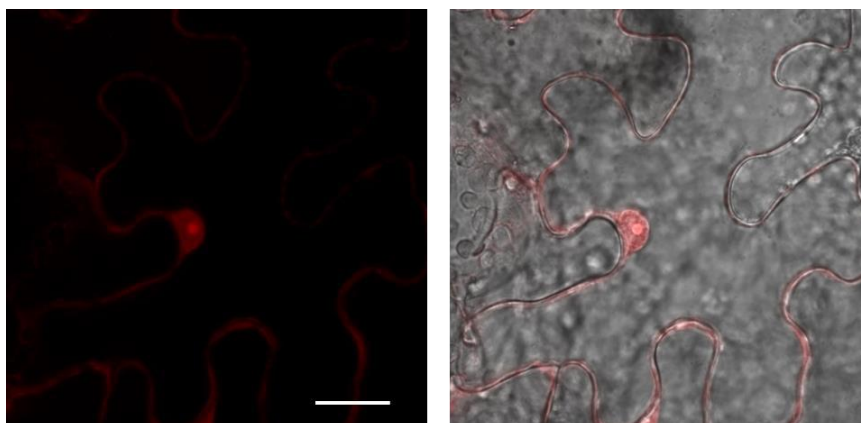

**Figure S3.** *NbMIG21p*:RFP intracellular localization. Images of 35S-*NbMIG21*:RFP expressing epidermal cells of *N. benthamiana* leaves 3 dpi obtained using confocal fluorescence microscopy. Projection of several confocal sections (left) superimposed on a bright field image of the same cell (right). Bar = 20  $\mu$ m.

**Table S1. PrMIG21 cis-acting elements analysis**

| Regulatory sequence | Position     | Sequence         | Function of site                                                                                                |
|---------------------|--------------|------------------|-----------------------------------------------------------------------------------------------------------------|
| <b>ABRE</b>         | -1016        | ACGTG            | cis-acting element involved in the abscisic acid responsiveness                                                 |
| <b>ARE</b>          | -944<br>-91  | AAACCA<br>AAACCA | cis-acting regulatory element essential for the anaerobic induction                                             |
| <b>Box 4</b>        | -235         | ATTAAT           | part of a conserved DNA module involved in light responsiveness [57]                                            |
| <b>MRE</b>          | -704         | AACCTAA          | MYB binding site involved in light responsiveness                                                               |
| <b>MYB</b>          | -767<br>-641 | CAACCA           | MYB-binding site [58]                                                                                           |
| <b>MYC</b>          | -913<br>-607 | CAATTG           | MYC-binding site [59]                                                                                           |
| <b>MYB</b>          | -801         | TAACTG           | MYB-binding site [60]                                                                                           |
| <b>TCA</b>          | -561         | TCATCTTCAT       | salicylic acids response motif [61]                                                                             |
| <b>STRE</b>         | -1008        | AGGGG            | present in the promoters of stress-regulated genes and is recognized by the transcription factors Msn2p/4p [62] |
| <b>G-box</b>        | -1016        | CACGTT           | cis-acting regulatory element involved in light responsiveness                                                  |

**Table S2. Oligonucleotides used for qRT-PCR and cloning**

| Name               | Sequence                         |
|--------------------|----------------------------------|
| qRT-NbMIG21_f      | GCAAATGGCACCAAACTC               |
| qRT-NbMIG21_r      | GTAGCAGTGGCACTTGTC               |
| 18S rRNA_f         | ACGGCTACCACATCCAAG               |
| 18S rRNA_r         | ACTCATTCCAATTACCAGACTC           |
| PP2A_f             | ATTGCTGCCTGTGGTTATTAC            |
| PP2A_r             | ATAGACTGAAGTGCTTGATTGG           |
| N-NbMIG21-Acc65I_f | <b>GGTACCATGGCATCACTTCAGTGC</b>  |
| N-NbMIG21-BamHI_r  | <b>GGATCCGCAGCTCCCTCTATTC</b>    |
| C-NbMIG21-BamHI_f  | <b>GGATCCCTGGCATCACTTCAGTGC</b>  |
| C-NbMIG21-SalI_r   | <b>GTCGACTCAGCTCCCTCTATTCTTG</b> |
| NbMIG21-NoLS-mut_f | TGGGATCAACGGGAACATCGACGGAAG      |
| NbMIG21-NoLS-mut_r | GTTCCCGTTGATCCCACTTCCCATTTG      |
| GFP-Acc65I_f       | <b>GGTACCATGAGCAAGGGCGAGG</b>    |
| GFP-BamHI_r        | <b>GGATCCTTTCTTGACAGCTCGTCC</b>  |
| GFP-PstI_r         | <b>CTGCAGTTACTTGTACAGCTCGTCC</b> |
| YN- Acc65I_f       | <b>GGTACCATGGTGGTGAGCAAGGGCG</b> |

|                     |                                       |
|---------------------|---------------------------------------|
| YN- BamHI_r         | <b>GGATCCCATGATATAGACGTTGTGGC</b>     |
| YC- Acc65I_f        | <b>GGTACCATGGCCGACAAGCAGAAGAAC</b>    |
| YC- BamHI_r         | <b>GGATCCTTTGGACTTGTACAGCTC</b>       |
| NbCoilin-Acc65I_f   | <b>GGTACCATGGAGGGCGTTAGGCTTC</b>      |
| NbCoilin-BamHI_r    | <b>GGATCCAATTTTGTCTGGGATCTTAGG</b>    |
| NbFib2-Acc65I_f     | <b>GGTACCATGGTTGCACCAACTAGAGG</b>     |
| NbFib2-BamHI_r      | <b>GGATCCGGCAGCAGCCTTCTGCTTC</b>      |
| 6H-NbMIG21-Acc65I_f | <b>GGTACCGCATCACTTCAGTGCC</b>         |
| PrNtPME-HindIII_f   | <b>AAGCTTGCTAGCAGGAACCTAATCAGG</b>    |
| PrNtPME- Acc65I_r   | <b>GGTACCGAGCTCCCGGCGAAGAAATC</b>     |
| PrMIG21-HindIII_f   | <b>AAGCTTGTTACCATGTCTATGTGGAGC</b>    |
| PrMIG21-NruI_r      | <b>TCGCGATGAATATGTCTGAAACTGAC</b>     |
| PrAELP-HindIII_f    | <b>AAGCTTAAAAACCTAACAATCC</b>         |
| PrAELP-NcoI_r       | <b>CCATGGCTCTAGTTGTTTTAGAG</b>        |
| PrKPILP-HindIII_f   | <b>AAGCTTAAATGAGAATTTACTTAAG</b>      |
| PrKPILP-NcoI_r      | <b>CCATGGTGTTAAGGATATGGTTAATG</b>     |
| PrThio-HindIII_f    | <b>AAGCTTACCAGCACCTAAGC</b>           |
| PrThio-NcoI_r       | <b>CCATGGAGTTACTTTGAATGAGTAAAAAAG</b> |
